# Supplementary material for: Mechanism of calcium in melatonin enhancement of functional substance-phenolic acid in germinated hulless barley
Source: Royal Society of Chemistry journal article supplement (doi:10.1039/d2ra05289j), 2022-01-01
Supplement: d2ra05289j1.pdf [file d2ra05289j1.pdf]

**Table S1** Sequence-specific primers used in this study.

| Gene                               | Gene name                                                 | Primer name | Primer sequences (5' - 3') |
|------------------------------------|-----------------------------------------------------------|-------------|----------------------------|
| <i>PAL</i>                         | Phenylalanine ammonia<br>lyase                            | Sense       | CACTGAATGCCGATCATACCC      |
|                                    |                                                           | Ant-sense   | CCGTTCCAACCCTTGAGACA       |
| <i>C4H</i>                         | Cinnamic acid-4-<br>hydroxylase                           | Sense       | AGCTCGCCGCTACAACATC        |
|                                    |                                                           | Ant-sense   | GCCTCCACGTGCTTCTCCTC       |
| <i>4CL</i>                         | 4-coumarate-CoA ligase                                    | Sense       | GGTGGAGATCGCCAAGAGCC       |
|                                    |                                                           | Ant-sense   | CTCCGTCATCCCGTACCCCT       |
| <i>C3H</i>                         | P-coumarate 3-<br>hydroxylase                             | Sense       | ATCACCGCTGGGATGGACA        |
|                                    |                                                           | Ant-sense   | GGTACGGCAGGTTCTGGAAGT      |
| <i>COMT</i>                        | Caffeic acid O-<br>methyltransferase                      | Sense       | GCCGTCAAAGGCATCAACT        |
|                                    |                                                           | Ant-sense   | GCAAGGCGTCATAGCAGTTC       |
| <i>F5H</i>                         | Ferulic acid 5-<br>hydroxylase                            | Sense       | TCGACGACATGCTCGCCTTC       |
|                                    |                                                           | Ant-sense   | TCCCGCCAAACATCACGTCC       |
| <i>CaMK1</i>                       | Calmodulin-dependent<br>protein kinase                    | Sense       | CGGTGTCCTTCATCTTGCG        |
|                                    |                                                           | Ant-sense   | ACGAGGTTGATGCTGACGG        |
| <i>CaMK2</i>                       | Calmodulin-dependent<br>protein kinase                    | Sense       | CAACGGCACCATGACTTCC        |
|                                    |                                                           | Ant-sense   | GCAGAGATGAAGCCGTTTTGG      |
| <i>CDPK</i>                        | Calcium dependent<br>protein kinase                       | Sense       | TTTGCTATGTGGTGTCCCCC       |
|                                    |                                                           | Ant-sense   | GCAGAGAGCCGCTTTGTAGG       |
| <i>CaMT</i>                        | Calmodulin-binding<br>transcription activated<br>protease | Sense       | ATCTCGAAGTCAAGGCTGGC       |
|                                    |                                                           | Ant-sense   | TCGTATTCAAGGCTTGTCGG       |
| <i>Ca<sup>2+</sup>-<br/>ATPase</i> | Calcium-ATPase                                            | Sense       | CCACCGTCATCTGCTCCGAC       |
|                                    |                                                           | Ant-sense   | ATTGCACACAGCTGCGACCT       |
| <i>Actin</i>                       | Reference gene                                            | Sense       | TCGTGAGAAGATGACCCAGA       |
|                                    |                                                           | Ant-sense   | CCGAGTCCAGCACAATACCT       |
